# Supplementary material for: A critical revelation of lithium ferromanganese phosphate (LMFP) performance in a Mn-rich cathode for Li-ion batteries using Fe equivalents to occupy a Mn site
Source: Royal Society of Chemistry journal article supplement (doi:10.1039/d4tc00049h), 2024-01-01
Supplement: d4tc00049h1.pdf [file d4tc00049h1.pdf]

# **A Critical Revelation of Lithium Ferromanganese Phosphates (LMFP) High Property in Mn-rich Cathode for Li-ion Batteries by Using Fe Equivalent to Occupy Mn Site**

*Ruifen Yang<sup>1,2</sup>, Longjiao Chang<sup>1,2\*</sup>, Shaohua Luo<sup>3,4\*</sup>, Xiaolong Bi<sup>1,2</sup>, Wei Yang<sup>1,2</sup>,  
Kedi Cai<sup>5,6</sup>, Anlu Wei<sup>1,2</sup>, Zenglei Hou<sup>1,2</sup>*

<sup>1</sup> School of Chemical and Material Engineering, Bohai University, Jinzhou, 121013, Liaoning China

<sup>2</sup> Liaoning Key Laboratory of Engineering Technology Research Center of Silicon Materials, Jinzhou, 121013, Liaoning China

<sup>3</sup> Key Laboratory of Dielectric and Electrolyte Functional Material Hebei Province, Qinhuangdao, 066004, Hebei China

<sup>4</sup> School of Resources and Materials, Northeastern University at Qinhuangdao, Qinhuangdao, 066004, Hebei China

<sup>5</sup> College of Chemistry and Materials Engineering, Bohai University, Jinzhou 121000, China

<sup>6</sup> Liaoning Engineering Technology Research Center of Supercapacitor, Bohai University, Jinzhou, 121013, China

## **Correspondence**

\*Longjiao Chang: [jsz337@sina.com](mailto:jsz337@sina.com)

\*Shaohua Luo: [tianyanglsh@163.com](mailto:tianyanglsh@163.com)

## Supplementary Tables

**Table. S1** Lattice parameters of Li(Mn<sub>1-x</sub>Fe<sub>x</sub>)PO<sub>4</sub>/C sample

| Sample | Lattice parameters(Å) |       |       | V(Å <sup>3</sup> ) | c/a   | Reliability fator(%) |                 |                |
|--------|-----------------------|-------|-------|--------------------|-------|----------------------|-----------------|----------------|
|        | a                     | b     | c     |                    |       | x <sup>2</sup>       | R <sub>wp</sub> | R <sub>p</sub> |
| x=0    | 10.451                | 6.106 | 4.745 | 303.998            | 0.454 | 1.224                | 6.75%           | 13.63%         |
| x=1/24 | 10.460                | 6.108 | 4.754 | 303.783            | 0.454 | 1.126                | 7.65%           | 13.27%         |
| x=1/12 | 10.440                | 6.097 | 4.748 | 302.195            | 0.455 | 1.139                | 8.41%           | 13.74%         |
| x=1/8  | 10.434                | 6.090 | 4.745 | 301.446            | 0.455 | 1.089                | 6.33%           | 13.28%         |
| x=1/4  | 10.426                | 6.084 | 4.743 | 300.668            | 0.455 | 1.134                | 77.43%          | 12.96%         |

**Tab. S2** Comparison of Li-O, P-O, Mn-O, Fe-O bond lengths and O-P-O bond angles of Li(Mn<sub>1-x</sub>Fe<sub>x</sub>)PO<sub>4</sub> systems

| x    | Li-O (Å) | Mn-O (Å) | P-O (Å) | Fe-O (Å) | O-P-O (°) |
|------|----------|----------|---------|----------|-----------|
| 0    | 2.1904   | 2.2274   | 1.5604  | /        | 112.9819  |
| 1/24 | 2.1918   | 2.2254   | 1.5611  | 2.2314   | 112.9824  |
| 1/12 | 2.1932   | 2.2266   | 1.5616  | 2.2356   | 112.9816  |
| 1/8  | 2.1949   | 2.2279   | 1.5619  | 2.2365   | 112.9811  |
| 1/4  | 2.1958   | 2.2287   | 1.5613  | 2.2341   | 112.9813  |

**Tab. S3** Average net charges of each atom in Li(Mn<sub>1-x</sub>Fe<sub>x</sub>)PO<sub>4</sub>

| Material species                                         | The average net charge of each atom (e) |        |         |        |        |
|----------------------------------------------------------|-----------------------------------------|--------|---------|--------|--------|
|                                                          | Li                                      | O      | Mn      | P      | Fe     |
| LiMnPO <sub>4</sub>                                      | -1.0500                                 | 0.8545 | -4.2450 | 2.5860 | /      |
| LiMn <sub>23/24</sub> Fe <sub>1/24</sub> PO <sub>4</sub> | -1.0511                                 | 0.8547 | -4.2454 | 2.5864 | 1.3990 |
| LiMn <sub>11/12</sub> Fe <sub>1/12</sub> PO <sub>4</sub> | -1.0512                                 | 0.8547 | -4.2460 | 2.5868 | 1.4000 |
| LiMn <sub>7/8</sub> Fe <sub>1/8</sub> PO <sub>4</sub>    | -1.0516                                 | 0.8548 | -4.2468 | 2.5865 | 1.3973 |
| LiMn <sub>3/4</sub> Fe <sub>1/4</sub> PO <sub>4</sub>    | -1.0518                                 | 0.8551 | -4.2485 | 2.5872 | 1.3873 |

**Tab. S4** After 25 charge/discharge cycles, the fitting parameters in the equivalent circuit in the EIS impedance diagram of Li(Mn<sub>1-x</sub>Fe<sub>x</sub>)PO<sub>4</sub>/C materials

| R <sub>e</sub> (Ω) | R <sub>f</sub> (Ω) | CPE-T (F) | R <sub>ct</sub> (Ω) |
|--------------------|--------------------|-----------|---------------------|
|--------------------|--------------------|-----------|---------------------|

|                                                          |      |       |      |        |
|----------------------------------------------------------|------|-------|------|--------|
| LiMnPO <sub>4</sub>                                      | 7.81 | 12.11 | 2.23 | 106.08 |
| LiMn <sub>23/24</sub> Fe <sub>1/24</sub> PO <sub>4</sub> | 6.58 | 10.51 | 2.95 | 96.91  |
| LiMn <sub>11/12</sub> Fe <sub>1/12</sub> PO <sub>4</sub> | 4.97 | 8.66  | 4.11 | 80.12  |
| LiMn <sub>7/8</sub> Fe <sub>1/8</sub> PO <sub>4</sub>    | 3.33 | 6.02  | 5.03 | 71.24  |
| LiMn <sub>1/3</sub> Fe <sub>1/4</sub> PO <sub>4</sub>    | 2.84 | 5.47  | 6.23 | 55.37  |

**Tab. S5** The  $D_{\text{Li}^+}$  and exchange current density for Li(Mn<sub>1-x</sub>Fe<sub>x</sub>)PO<sub>4</sub>/C materials after 25 charge/discharge cycles

|                                                          | cycles                                         |                                                       |                              |                              |
|----------------------------------------------------------|------------------------------------------------|-------------------------------------------------------|------------------------------|------------------------------|
|                                                          | $\sigma$ (cm <sup>2</sup> ·s <sup>-1/2</sup> ) | $D_{\text{Li}^+}$ (cm <sup>2</sup> ·s <sup>-1</sup> ) | $R_{\text{ct}}$ ( $\Omega$ ) | $I^0$ (mA·cm <sup>-2</sup> ) |
| LiMnPO <sub>4</sub>                                      | 16.168                                         | $6.419 \times 10^{-13}$                               | 106.08                       | $2.42 \times 10^{-4}$        |
| LiMn <sub>23/24</sub> Fe <sub>1/24</sub> PO <sub>4</sub> | 14.972                                         | $7.485 \times 10^{-13}$                               | 96.91                        | $2.65 \times 10^{-4}$        |
| LiMn <sub>11/12</sub> Fe <sub>1/12</sub> PO <sub>4</sub> | 14.671                                         | $7.796 \times 10^{-13}$                               | 80.12                        | $3.20 \times 10^{-4}$        |
| LiMn <sub>7/8</sub> Fe <sub>1/8</sub> PO <sub>4</sub>    | 13.653                                         | $9.002 \times 10^{-13}$                               | 71.24                        | $3.60 \times 10^{-4}$        |
| LiMn <sub>1/3</sub> Fe <sub>1/4</sub> PO <sub>4</sub>    | 9.102                                          | $2.025 \times 10^{-12}$                               | 55.37                        | $4.64 \times 10^{-4}$        |

## Supplementary Figures

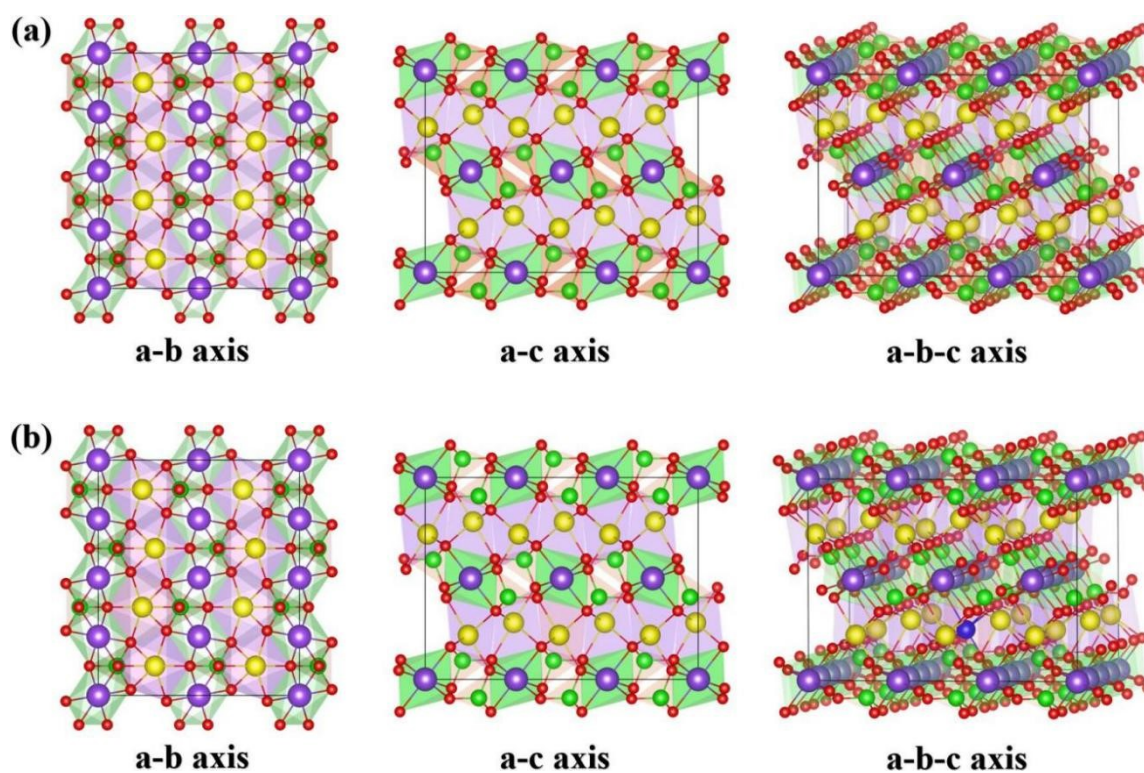

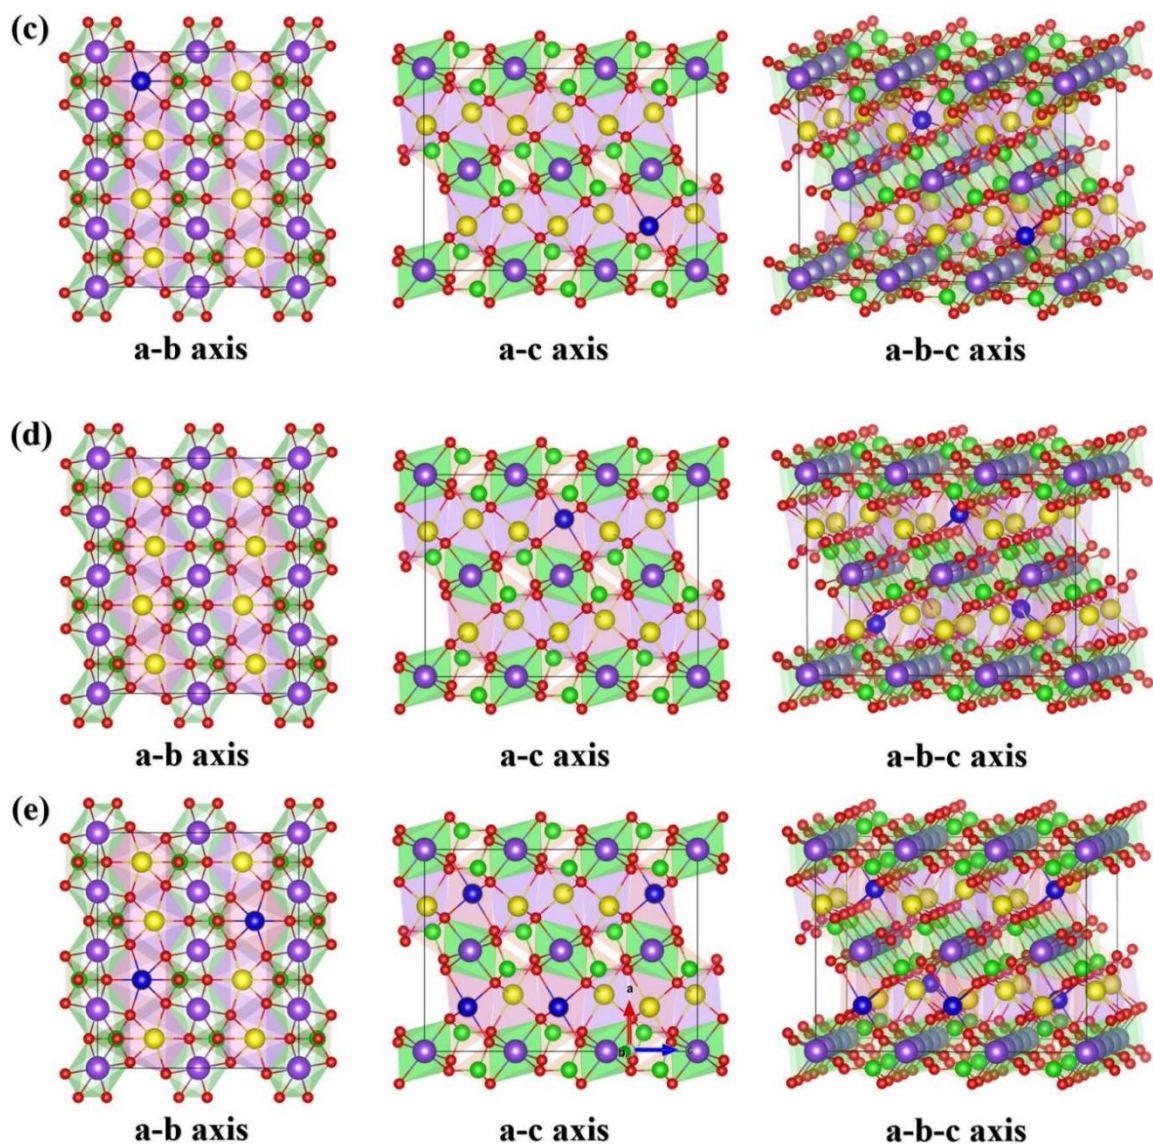

**Fig. S1** Supercell structure of  $\text{Li}(\text{Mn}_{1-x}\text{Fe}_x)\text{PO}_4/\text{C}$  system and position of Fe element under different doping quantities: (a)  $\text{LiMnPO}_4$ ; (b)  $\text{LiMn}_{23/24}\text{Fe}_{1/24}\text{PO}_4$ ; (c)  $\text{LiMn}_{11/12}\text{Fe}_{1/12}\text{PO}_4$ ; (d)  $\text{LiMn}_{7/8}\text{Fe}_{1/8}\text{PO}_4$ ; (e)  $\text{LiMn}_{3/4}\text{Fe}_{1/4}\text{PO}_4$  (purple is Li atom, yellow is Mn atom, blue is Fe atom, green is P atom, red is O atom)

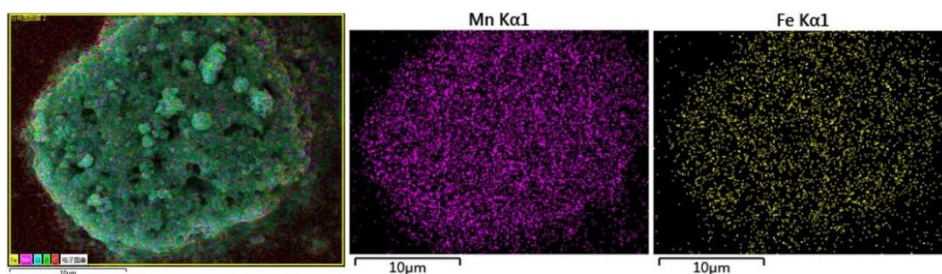

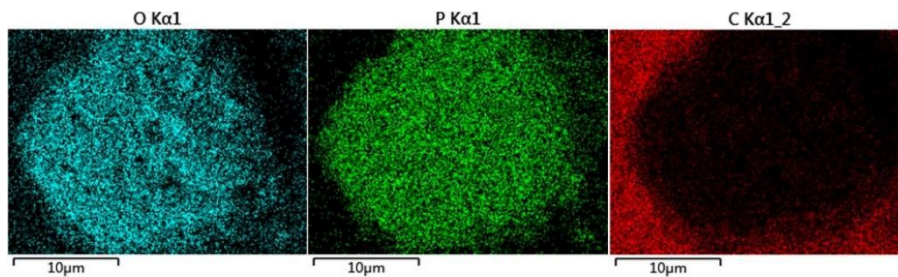

**Fig. S3** The EDS pattern of  $\text{LiMn}_{3/4}\text{Fe}_{1/4}\text{PO}_4/\text{C}$

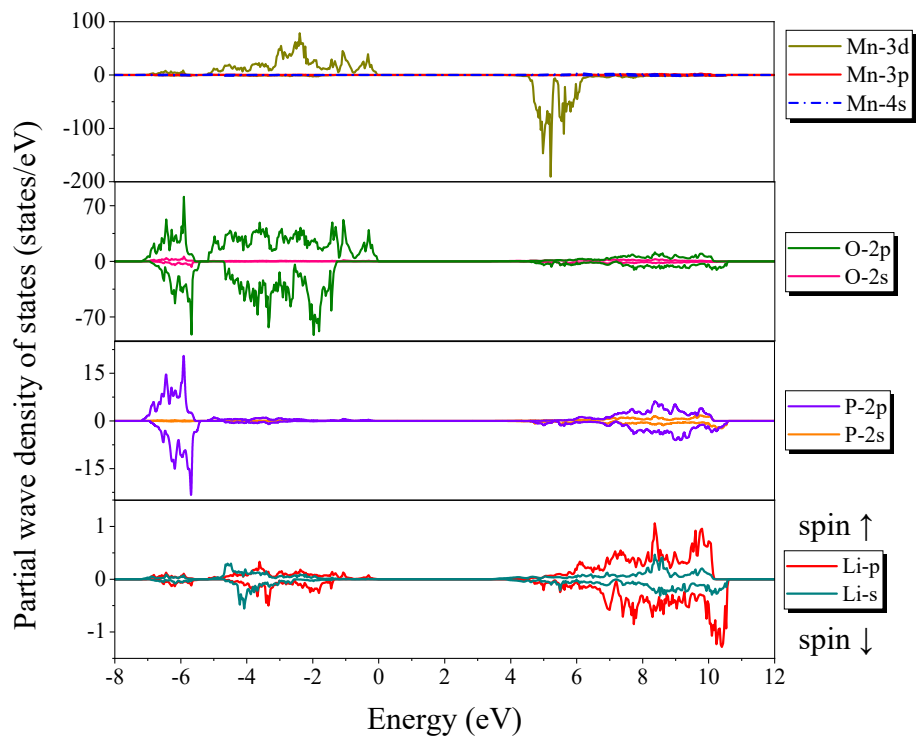

**Fig. S4** Partial wave density of states (PDOS) of each atom in the s, p and d orbitals of  $\text{LiMnPO}_4$  supercell

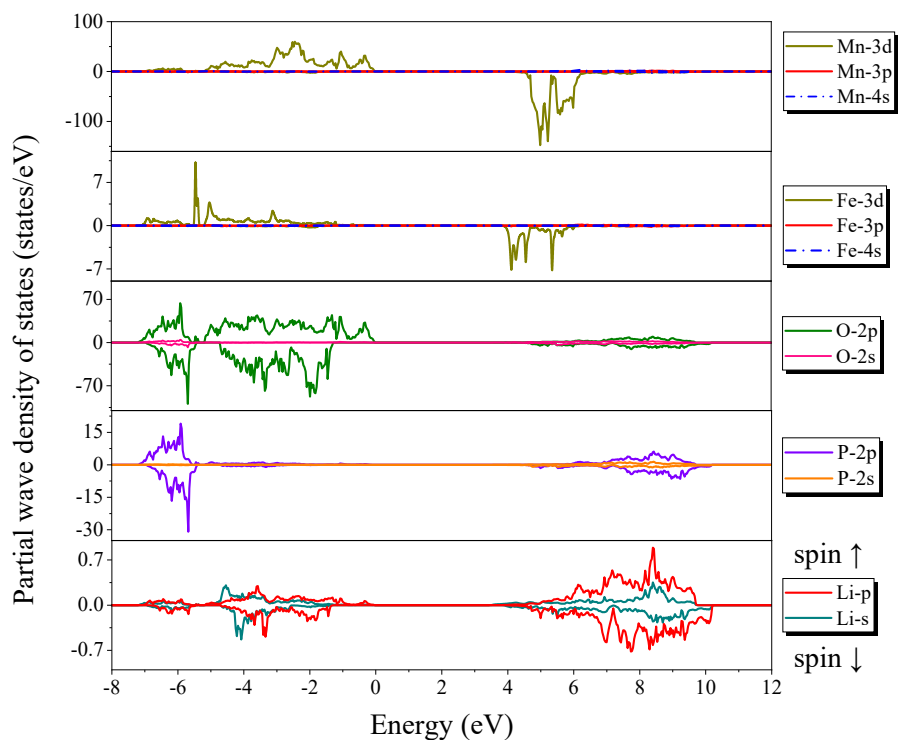

**Fig. S5** Partial wave density of states (PDOS) of each atom in the s, p and d orbitals of  $\text{LiMn}_{23/24}\text{Fe}_{1/24}\text{PO}_4$

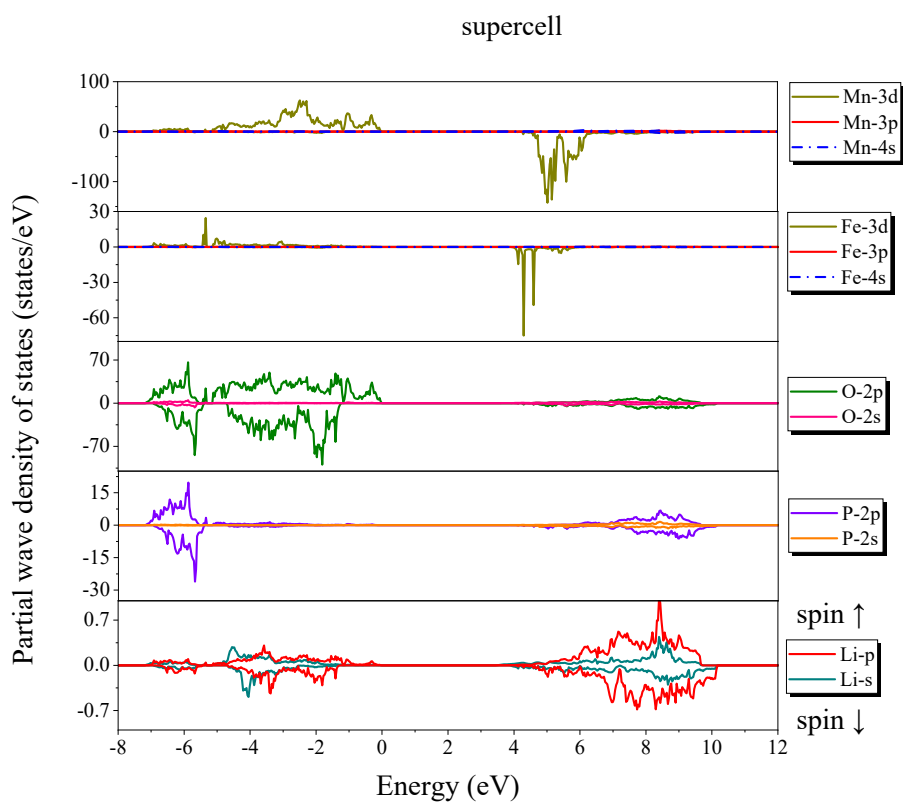

**Fig. S6** Partial wave density of states (PDOS) of each atom in the s, p and d orbitals of  $\text{LiMn}_{11/12}\text{Fe}_{1/12}\text{PO}_4$

supercell

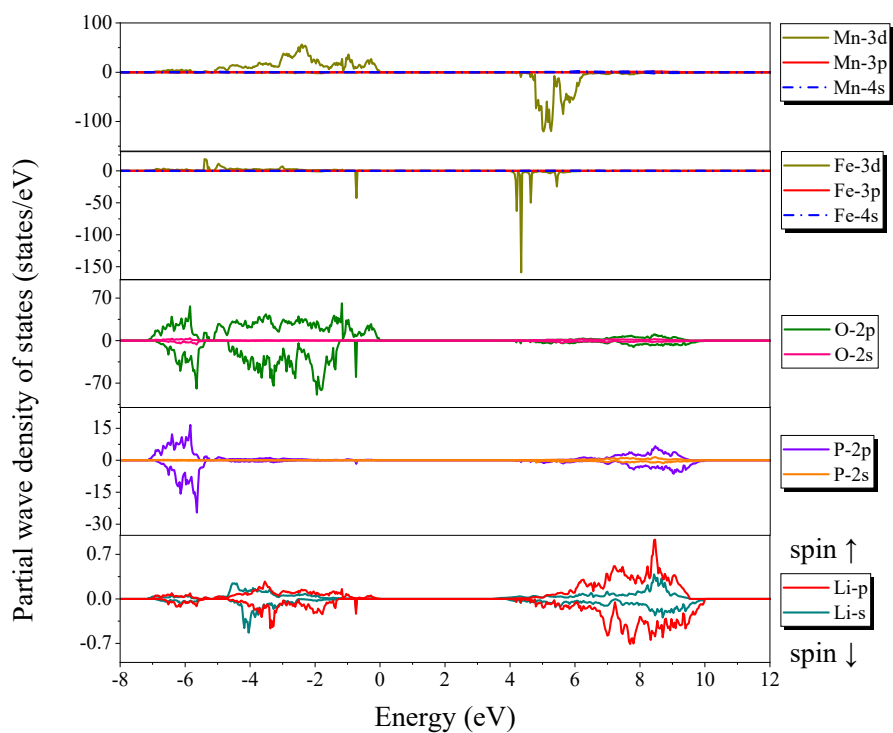

**Fig. S7** Partial wave density of states (PDOS) of each atom in the s, p and d orbitals of  $\text{LiMn}_{7/8}\text{Fe}_{1/8}\text{PO}_4$  supercell

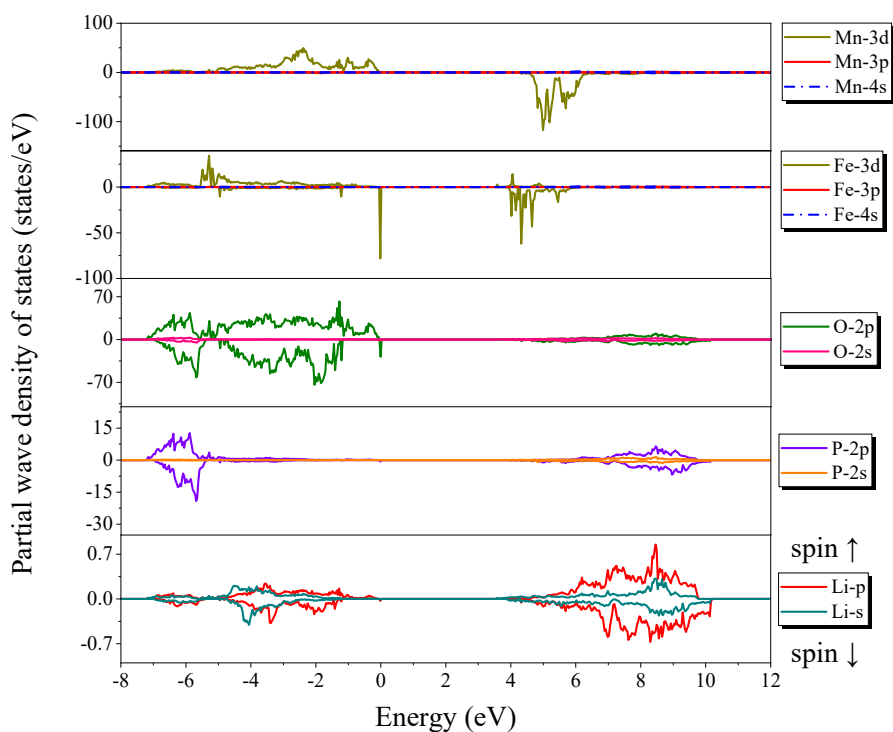

**Fig. S8** Partial wave density of states (PDOS) of each atom in the s, p and d orbitals of  $\text{LiMn}_{3/4}\text{Fe}_{1/4}\text{PO}_4$  supercell

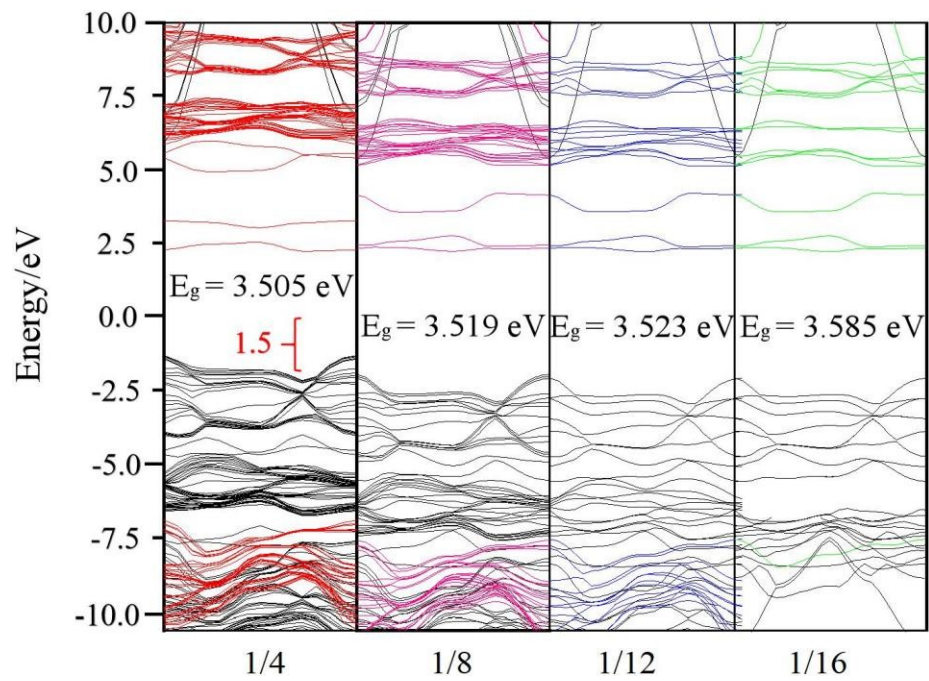

**Fig. S9** Band structure of  $\text{Li}(\text{Mn}_{1-x}\text{Fe}_x)\text{PO}_4$  at Fermi level
